# Supplementary material
Source: PubMed Central journal article supplement (PMC8332868)
Supplement: ajcr0011-3575-f8.pdf [file ajcr0011-3575-f8.pdf]

## Mechanism of shikonin in hepatocellular carcinoma

**Table S1.** Differentially expressed proteins in the comparisons of shikonin treated HCC

| Name   | FC <sup>a</sup> | P value  | F-FC <sup>b</sup> | F-L <sup>c</sup> | F-H <sup>d</sup> | R-FC <sup>e</sup> | R-L <sup>f</sup> | R-H <sup>g</sup> |
|--------|-----------------|----------|-------------------|------------------|------------------|-------------------|------------------|------------------|
| Q53S33 | 1.36            | 5.31E-06 | 1.36              | 115.4            | 84.6             | 1.36              | 84.7             | 115.3            |
| Q9BQE4 | 1.74            | 6.91E-06 | 1.73              | 126.8            | 73.2             | 1.74              | 73               | 127              |
| Q13206 | 1.29            | 7.81E-06 | 1.29              | 112.6            | 87.4             | 1.29              | 87.3             | 112.7            |
| Q13907 | 1.25            | 1.02E-05 | 1.25              | 111.1            | 88.9             | 1.25              | 89               | 111              |
| P04792 | 1.22            | 1.29E-05 | 1.22              | 109.8            | 90.2             | 1.22              | 90.1             | 109.9            |
| P53621 | 1.51            | 2.74E-05 | 1.51              | 120.1            | 79.9             | 1.51              | 79.6             | 120.4            |
| Q01995 | 1.57            | 4.02E-05 | 1.58              | 122.5            | 77.5             | 1.57              | 77.9             | 122.1            |
| O43709 | 1.24            | 4.45E-05 | 1.24              | 110.5            | 89.5             | 1.24              | 89.3             | 110.7            |
| Q96L91 | 1.22            | 5.10E-05 | 1.22              | 110              | 90               | 1.22              | 90.2             | 109.8            |
| Q9H2C0 | 1.48            | 5.26E-05 | 1.49              | 119.7            | 80.3             | 1.48              | 80.7             | 119.3            |
| Q9NUQ3 | 1.31            | 0.000111 | 1.32              | 113.6            | 86.4             | 1.3               | 86.8             | 113.2            |
| Q86X95 | 1.5             | 0.000112 | 1.49              | 119.7            | 80.3             | 1.51              | 79.7             | 120.3            |
| O95817 | 1.51            | 0.000148 | 1.5               | 120              | 80               | 1.52              | 79.3             | 120.7            |
| P17980 | 1.33            | 0.000156 | 1.34              | 114.4            | 85.6             | 1.32              | 86.1             | 113.9            |
| P02794 | 2.46            | 0.000158 | 2.5               | 142.9            | 57.1             | 2.42              | 58.6             | 141.4            |
| Q96N67 | 1.47            | 0.000169 | 1.46              | 118.7            | 81.3             | 1.48              | 80.6             | 119.4            |
| Q12830 | 1.95            | 0.000175 | 1.97              | 132.7            | 67.3             | 1.92              | 68.5             | 131.5            |
| Q6PCE3 | 1.36            | 0.000197 | 1.36              | 115.4            | 84.6             | 1.35              | 85.2             | 114.8            |
| Q13885 | 1.28            | 0.000212 | 1.27              | 111.9            | 88.1             | 1.28              | 87.6             | 112.4            |
| Q5W0Z9 | 2.13            | 0.000309 | 2.09              | 135.3            | 64.7             | 2.18              | 62.9             | 137.1            |
| Q9UGU5 | 1.31            | 0.000349 | 1.32              | 113.6            | 86.4             | 1.3               | 87.1             | 112.9            |
| P50452 | 1.21            | 0.00035  | 1.22              | 109.7            | 90.3             | 1.2               | 90.8             | 109.2            |
| Q9GZR7 | 1.58            | 0.000359 | 1.56              | 121.8            | 78.2             | 1.6               | 77               | 123              |
| P46821 | 2.18            | 0.000399 | 2.13              | 136.1            | 63.9             | 2.23              | 61.8             | 138.2            |
| P17275 | 1.64            | 0.000685 | 1.67              | 125.2            | 74.8             | 1.61              | 76.6             | 123.4            |
| O76021 | 1.45            | 0.000715 | 1.48              | 119.2            | 80.8             | 1.43              | 82.2             | 117.8            |
| O95602 | 1.23            | 0.000725 | 1.23              | 110.1            | 89.9             | 1.25              | 89.1             | 110.9            |
| Q7L3B6 | 1.34            | 0.000832 | 1.36              | 115.3            | 84.7             | 1.33              | 85.9             | 114.1            |
| Q9BS26 | 1.21            | 0.000924 | 1.2               | 108.9            | 91.1             | 1.22              | 90.3             | 109.7            |
| P62993 | 1.29            | 0.000929 | 1.28              | 112.2            | 87.8             | 1.31              | 86.7             | 113.3            |
| P11387 | 1.67            | 0.000959 | 1.63              | 124              | 76               | 1.71              | 73.8             | 126.2            |
| Q14573 | 1.28            | 0.00099  | 1.27              | 111.8            | 88.2             | 1.3               | 87.1             | 112.9            |
| Q969X6 | 1.45            | 0.00106  | 1.48              | 119.3            | 80.7             | 1.43              | 82.4             | 117.6            |
| Q8IZP0 | 1.36            | 0.001073 | 1.34              | 114.4            | 85.6             | 1.38              | 84.2             | 115.8            |
| Q9P270 | 1.36            | 0.001192 | 1.38              | 116.1            | 83.9             | 1.34              | 85.4             | 114.6            |
| P48507 | 2.04            | 0.001303 | 1.97              | 132.5            | 67.5             | 2.13              | 64               | 136              |
| O00459 | 1.68            | 0.001318 | 1.63              | 124              | 76               | 1.72              | 73.4             | 126.6            |
| Q96HA1 | 1.21            | 0.001442 | 1.19              | 108.8            | 91.2             | 1.22              | 90.2             | 109.8            |
| Q9NQ29 | 1.32            | 0.001463 | 1.3               | 113.1            | 86.9             | 1.34              | 85.4             | 114.6            |
| Q9BYG3 | 1.23            | 0.001465 | 1.24              | 110.7            | 89.3             | 1.21              | 90.4             | 109.6            |
| Q71RC2 | 1.4             | 0.001605 | 1.38              | 115.8            | 84.2             | 1.43              | 82.3             | 117.7            |
| O95707 | 1.32            | 0.001652 | 1.3               | 113.1            | 86.9             | 1.35              | 85.3             | 114.7            |
| Q9Y5X2 | 1.35            | 0.001656 | 1.37              | 115.6            | 84.4             | 1.32              | 86.1             | 113.9            |
| P07339 | 1.29            | 0.001753 | 1.27              | 111.9            | 88.1             | 1.31              | 86.6             | 113.4            |
| P02792 | 2.86            | 0.001805 | 3.09              | 151.1            | 48.9             | 2.66              | 54.7             | 145.3            |
| P25685 | 1.92            | 0.00201  | 2.01              | 133.5            | 66.5             | 1.84              | 70.5             | 129.5            |
| Q15527 | 1.27            | 0.002252 | 1.29              | 112.7            | 87.3             | 1.25              | 88.9             | 111.1            |

## Mechanism of shikonin in hepatocellular carcinoma

|        |      |          |      |       |      |      |      |       |
|--------|------|----------|------|-------|------|------|------|-------|
| Q04721 | 1.28 | 0.002322 | 1.31 | 113.3 | 86.7 | 1.26 | 88.4 | 111.6 |
| P82970 | 1.36 | 0.002331 | 1.39 | 116.4 | 83.6 | 1.33 | 85.7 | 114.3 |
| O60885 | 1.26 | 0.00237  | 1.24 | 110.8 | 89.2 | 1.28 | 87.6 | 112.4 |
| Q15910 | 1.33 | 0.002436 | 1.31 | 113.3 | 86.7 | 1.36 | 84.7 | 115.3 |
| Q6P4R8 | 1.37 | 0.002445 | 1.34 | 114.6 | 85.4 | 1.4  | 83.2 | 116.8 |
| Q92598 | 1.5  | 0.002466 | 1.45 | 118.5 | 81.5 | 1.54 | 78.7 | 121.3 |
| Q92793 | 1.35 | 0.002524 | 1.32 | 113.7 | 86.3 | 1.38 | 84.2 | 115.8 |
| Q9Y5Q8 | 1.58 | 0.002541 | 1.53 | 120.8 | 79.2 | 1.63 | 76   | 124   |
| Q9NV06 | 1.67 | 0.002562 | 1.61 | 123.3 | 76.7 | 1.73 | 73.1 | 126.9 |
| Q9UHY1 | 1.25 | 0.002587 | 1.27 | 111.9 | 88.1 | 1.23 | 89.7 | 110.3 |
| Q13200 | 1.31 | 0.002773 | 1.34 | 114.4 | 85.6 | 1.28 | 87.6 | 112.4 |
| Q8N6T7 | 2    | 0.002806 | 2.12 | 135.8 | 64.2 | 1.89 | 69.2 | 130.8 |
| Q9H3C7 | 1.72 | 0.003013 | 1.79 | 128.4 | 71.6 | 1.64 | 75.7 | 124.3 |
| Q8TF74 | 2.39 | 0.003032 | 2.59 | 144.2 | 55.8 | 2.21 | 62.2 | 137.8 |
| Q9P035 | 1.26 | 0.003048 | 1.28 | 112.4 | 87.6 | 1.24 | 89.4 | 110.6 |
| P51784 | 1.53 | 0.003117 | 1.58 | 122.5 | 77.5 | 1.48 | 80.8 | 119.2 |
| Q9Y2K7 | 2.7  | 0.003154 | 2.46 | 142.2 | 57.8 | 2.96 | 50.5 | 149.5 |
| Q92890 | 1.25 | 0.003157 | 1.23 | 110.4 | 89.6 | 1.28 | 87.8 | 112.2 |
| Q5T310 | 1.3  | 0.003173 | 1.28 | 112.1 | 87.9 | 1.33 | 85.8 | 114.2 |
| Q7Z739 | 1.25 | 0.003271 | 1.27 | 112   | 88   | 1.23 | 89.8 | 110.2 |
| P35251 | 1.4  | 0.003271 | 1.36 | 115.3 | 84.7 | 1.44 | 82   | 118   |
| O00220 | 1.24 | 0.003391 | 1.27 | 111.8 | 88.2 | 1.22 | 90   | 110   |
| Q9NQ55 | 1.61 | 0.003469 | 1.68 | 125.3 | 74.7 | 1.54 | 78.6 | 121.4 |
| Q9NV31 | 1.61 | 0.003499 | 1.67 | 125.2 | 74.8 | 1.54 | 78.7 | 121.3 |
| O95361 | 1.34 | 0.00362  | 1.31 | 113.4 | 86.6 | 1.38 | 84.1 | 115.9 |
| Q7Z4S6 | 1.67 | 0.003663 | 1.59 | 122.9 | 77.1 | 1.75 | 72.8 | 127.2 |
| Q9H2J7 | 1.38 | 0.003854 | 1.42 | 117.3 | 82.7 | 1.34 | 85.5 | 114.5 |
| Q96I51 | 1.28 | 0.003975 | 1.25 | 111.2 | 88.8 | 1.31 | 86.6 | 113.4 |
| P46734 | 1.35 | 0.004052 | 1.31 | 113.6 | 86.4 | 1.39 | 83.7 | 116.3 |
| Q9UHR4 | 1.28 | 0.004107 | 1.31 | 113.2 | 86.8 | 1.25 | 89   | 111   |
| Q8IX18 | 1.76 | 0.004287 | 1.66 | 124.9 | 75.1 | 1.86 | 70   | 130   |
| Q15121 | 1.35 | 0.004385 | 1.31 | 113.5 | 86.5 | 1.39 | 83.7 | 116.3 |
| Q00534 | 1.83 | 0.004535 | 1.95 | 132.1 | 67.9 | 1.72 | 73.5 | 126.5 |
| Q9H0U3 | 1.26 | 0.004544 | 1.23 | 110.4 | 89.6 | 1.29 | 87.4 | 112.6 |
| Q96TA2 | 1.46 | 0.004552 | 1.52 | 120.6 | 79.4 | 1.41 | 83   | 117   |
| PODMV9 | 2.15 | 0.004829 | 2.34 | 140.1 | 59.9 | 1.98 | 67.1 | 132.9 |
| Q6ZXV5 | 1.32 | 0.004855 | 1.28 | 112.3 | 87.7 | 1.35 | 85   | 115   |
| O95801 | 1.26 | 0.005006 | 1.23 | 110.3 | 89.7 | 1.29 | 87.4 | 112.6 |
| Q96CN9 | 2.33 | 0.005012 | 2.56 | 143.8 | 56.2 | 2.12 | 64.2 | 135.8 |
| Q9NX55 | 1.53 | 0.005176 | 1.47 | 118.9 | 81.1 | 1.6  | 76.8 | 123.2 |
| Q9NYP7 | 1.23 | 0.005308 | 1.2  | 109.1 | 90.9 | 1.25 | 88.8 | 111.2 |
| Q9NXV2 | 2.54 | 0.005813 | 2.85 | 148.1 | 51.9 | 2.26 | 61.3 | 138.7 |
| Q08AM6 | 1.31 | 0.005847 | 1.27 | 111.9 | 88.1 | 1.35 | 85.2 | 114.8 |
| P35610 | 1.34 | 0.005951 | 1.3  | 113   | 87   | 1.39 | 83.8 | 116.2 |
| Q8WWK9 | 1.94 | 0.006116 | 1.79 | 128.4 | 71.6 | 2.1  | 64.5 | 135.5 |
| P43686 | 1.25 | 0.006116 | 1.29 | 112.5 | 87.5 | 1.22 | 90   | 110   |
| Q8WTT2 | 1.23 | 0.006357 | 1.25 | 111.3 | 88.7 | 1.2  | 91   | 109   |
| Q9HBH0 | 1.97 | 0.006379 | 2.14 | 136.3 | 63.7 | 1.81 | 71.1 | 128.9 |
| O00267 | 1.2  | 0.006381 | 1.23 | 110.3 | 89.7 | 1.18 | 91.8 | 108.2 |

## Mechanism of shikonin in hepatocellular carcinoma

|        |      |          |      |       |      |      |      |       |
|--------|------|----------|------|-------|------|------|------|-------|
| Q8TED0 | 1.27 | 0.006536 | 1.23 | 110.4 | 89.6 | 1.3  | 86.9 | 113.1 |
| Q9BTC0 | 1.34 | 0.006621 | 1.39 | 116.4 | 83.6 | 1.3  | 87   | 113   |
| O14745 | 1.23 | 0.006718 | 1.2  | 109.1 | 90.9 | 1.26 | 88.5 | 111.5 |
| Q9H8H2 | 1.48 | 0.006762 | 1.55 | 121.5 | 78.5 | 1.41 | 83   | 117   |
| Q8N6N3 | 1.63 | 0.006849 | 1.53 | 121   | 79   | 1.73 | 73.4 | 126.6 |
| Q9NQ84 | 2.17 | 0.007034 | 2.41 | 141.3 | 58.7 | 1.96 | 67.5 | 132.5 |
| P62195 | 1.24 | 0.007037 | 1.21 | 109.6 | 90.4 | 1.28 | 87.8 | 112.2 |
| Q03519 | 1.43 | 0.007338 | 1.49 | 119.8 | 80.2 | 1.37 | 84.5 | 115.5 |
| Q9H2D6 | 1.49 | 0.007339 | 1.42 | 117.3 | 82.7 | 1.57 | 77.9 | 122.1 |
| Q13867 | 1.23 | 0.007354 | 1.26 | 111.5 | 88.5 | 1.2  | 91   | 109   |
| Q8TCJ2 | 1.23 | 0.007498 | 1.26 | 111.4 | 88.6 | 1.2  | 91.1 | 108.9 |
| Q96QG7 | 1.42 | 0.007505 | 1.49 | 119.6 | 80.4 | 1.36 | 84.7 | 115.3 |
| Q9H6W3 | 2.24 | 0.007523 | 2.5  | 142.8 | 57.2 | 2.01 | 66.6 | 133.4 |
| Q4LE39 | 1.51 | 0.007836 | 1.59 | 122.8 | 77.2 | 1.43 | 82.3 | 117.7 |
| Q969S3 | 1.65 | 0.007847 | 1.77 | 127.7 | 72.3 | 1.55 | 78.5 | 121.5 |
| Q9C0J8 | 1.38 | 0.008058 | 1.44 | 118.1 | 81.9 | 1.33 | 86   | 114   |
| O15213 | 1.21 | 0.008222 | 1.24 | 110.5 | 89.5 | 1.18 | 91.9 | 108.1 |
| Q9H9T3 | 1.24 | 0.008609 | 1.27 | 112   | 88   | 1.2  | 90.8 | 109.2 |
| Q9UDY4 | 1.77 | 0.008741 | 1.64 | 124.1 | 75.9 | 1.92 | 68.5 | 131.5 |
| O75351 | 1.47 | 0.00875  | 1.4  | 116.6 | 83.4 | 1.55 | 78.3 | 121.7 |
| Q9UHQ9 | 1.41 | 0.008925 | 1.48 | 119.4 | 80.6 | 1.35 | 85.2 | 114.8 |
| P63000 | 1.28 | 0.00895  | 1.32 | 113.9 | 86.1 | 1.24 | 89.4 | 110.6 |
| Q9BZE4 | 1.38 | 0.008963 | 1.44 | 118.1 | 81.9 | 1.32 | 86.2 | 113.8 |
| Q5QJE6 | 1.39 | 0.009096 | 1.33 | 114   | 86   | 1.45 | 81.6 | 118.4 |
| Q9NVP1 | 1.3  | 0.00945  | 1.35 | 114.8 | 85.2 | 1.25 | 88.8 | 111.2 |
| Q99614 | 1.35 | 0.00952  | 1.29 | 112.7 | 87.3 | 1.4  | 83.2 | 116.8 |
| Q9BYJ9 | 1.57 | 0.009609 | 1.47 | 119.1 | 80.9 | 1.68 | 74.7 | 125.3 |
| O43474 | 1.87 | 0.009663 | 2.06 | 134.6 | 65.4 | 1.71 | 73.9 | 126.1 |
| Q86U38 | 1.26 | 0.009881 | 1.31 | 113.3 | 86.7 | 1.22 | 90   | 110   |
| P36543 | 1.27 | 0.010051 | 1.32 | 113.6 | 86.4 | 1.23 | 89.8 | 110.2 |
| Q9Y520 | 1.24 | 0.010051 | 1.21 | 109.3 | 90.7 | 1.28 | 87.6 | 112.4 |
| P49585 | 1.74 | 0.010124 | 1.89 | 130.7 | 69.3 | 1.6  | 77   | 123   |
| P17535 | 1.31 | 0.010197 | 1.37 | 115.5 | 84.5 | 1.26 | 88.4 | 111.6 |
| P50454 | 1.29 | 0.010838 | 1.35 | 114.7 | 85.3 | 1.24 | 89.1 | 110.9 |
| Q8NCA5 | 1.25 | 0.011163 | 1.29 | 112.6 | 87.4 | 1.21 | 90.7 | 109.3 |
| P48729 | 1.33 | 0.011628 | 1.4  | 116.5 | 83.5 | 1.28 | 87.9 | 112.1 |
| P46379 | 1.68 | 0.011765 | 1.54 | 121.3 | 78.7 | 1.82 | 70.9 | 129.1 |
| P51149 | 1.21 | 0.011812 | 1.24 | 110.8 | 89.2 | 1.17 | 92.1 | 107.9 |
| Q13445 | 1.45 | 0.011975 | 1.54 | 121.1 | 78.9 | 1.37 | 84.6 | 115.4 |
| Q9NYH9 | 1.41 | 0.012237 | 1.34 | 114.4 | 85.6 | 1.49 | 80.2 | 119.8 |
| P14373 | 1.26 | 0.012237 | 1.31 | 113.2 | 86.8 | 1.21 | 90.4 | 109.6 |
| P47712 | 1.23 | 0.01247  | 1.19 | 108.7 | 91.3 | 1.27 | 88   | 112   |
| Q8WW22 | 1.33 | 0.013512 | 1.4  | 116.5 | 83.5 | 1.27 | 88.2 | 111.8 |
| Q9P265 | 1.26 | 0.013721 | 1.31 | 113.6 | 86.4 | 1.22 | 90.3 | 109.7 |
| Q14764 | 2.43 | 0.013767 | 2.88 | 148.4 | 51.6 | 2.05 | 65.5 | 134.5 |
| O00116 | 1.27 | 0.014061 | 1.32 | 113.8 | 86.2 | 1.22 | 90.2 | 109.8 |
| O95470 | 1.3  | 0.014233 | 1.36 | 115.1 | 84.9 | 1.24 | 89.3 | 110.7 |
| Q14807 | 1.25 | 0.014336 | 1.2  | 109.2 | 90.8 | 1.3  | 87   | 113   |
| Q9NY93 | 1.3  | 0.014843 | 1.25 | 110.9 | 89.1 | 1.37 | 84.5 | 115.5 |

## Mechanism of shikonin in hepatocellular carcinoma

|        |      |          |      |       |      |      |      |       |
|--------|------|----------|------|-------|------|------|------|-------|
| Q16222 | 1.41 | 0.014982 | 1.32 | 113.9 | 86.1 | 1.49 | 80.2 | 119.8 |
| Q9H7B2 | 1.44 | 0.015051 | 1.35 | 114.8 | 85.2 | 1.54 | 78.9 | 121.1 |
| O75691 | 1.81 | 0.01532  | 1.62 | 123.7 | 76.3 | 2.03 | 66.1 | 133.9 |
| Q9BYN0 | 1.55 | 0.015446 | 1.43 | 117.8 | 82.2 | 1.68 | 74.5 | 125.5 |
| P23921 | 1.27 | 0.015547 | 1.22 | 109.9 | 90.1 | 1.33 | 85.8 | 114.2 |
| P17844 | 1.34 | 0.015699 | 1.27 | 111.9 | 88.1 | 1.41 | 82.9 | 117.1 |
| O75128 | 1.44 | 0.015826 | 1.35 | 114.8 | 85.2 | 1.54 | 78.7 | 121.3 |
| Q6WKZ4 | 1.49 | 0.01609  | 1.6  | 123.1 | 76.9 | 1.38 | 84   | 116   |
| Q96RK0 | 1.53 | 0.016282 | 1.41 | 117   | 83   | 1.65 | 75.4 | 124.6 |
| Q92597 | 1.21 | 0.0163   | 1.25 | 111   | 89   | 1.16 | 92.4 | 107.6 |
| Q969Y2 | 1.27 | 0.016393 | 1.22 | 109.8 | 90.2 | 1.33 | 85.8 | 114.2 |
| Q7KZI7 | 1.36 | 0.016761 | 1.44 | 117.9 | 82.1 | 1.28 | 87.7 | 112.3 |
| Q8TDD1 | 1.26 | 0.017176 | 1.32 | 113.6 | 86.4 | 1.21 | 90.7 | 109.3 |
| Q14690 | 1.76 | 0.017412 | 1.97 | 132.7 | 67.3 | 1.57 | 77.7 | 122.3 |
| Q15012 | 1.61 | 0.017513 | 1.76 | 127.6 | 72.4 | 1.46 | 81.2 | 118.8 |
| O15498 | 1.28 | 0.017627 | 1.34 | 114.7 | 85.3 | 1.22 | 90   | 110   |
| Q02880 | 1.53 | 0.017661 | 1.67 | 125   | 75   | 1.41 | 83   | 117   |
| Q9BXJ9 | 1.27 | 0.018491 | 1.22 | 109.7 | 90.3 | 1.34 | 85.6 | 114.4 |
| Q49B96 | 1.69 | 0.018835 | 1.88 | 130.7 | 69.3 | 1.52 | 79.4 | 120.6 |
| Q9BTT4 | 1.3  | 0.019132 | 1.23 | 110.5 | 89.5 | 1.37 | 84.3 | 115.7 |
| Q8N1G2 | 1.31 | 0.019138 | 1.38 | 116   | 84   | 1.24 | 89.3 | 110.7 |
| Q9Y3C7 | 1.22 | 0.019419 | 1.17 | 107.8 | 92.2 | 1.27 | 88.3 | 111.7 |
| Q8IZH2 | 1.23 | 0.019784 | 1.29 | 112.5 | 87.5 | 1.18 | 91.7 | 108.3 |
| Q6R327 | 1.4  | 0.019871 | 1.51 | 120.2 | 79.8 | 1.31 | 86.6 | 113.4 |
| Q16666 | 1.75 | 0.01998  | 1.97 | 132.6 | 67.4 | 1.55 | 78.4 | 121.6 |
| Q12929 | 1.42 | 0.020082 | 1.52 | 120.7 | 79.3 | 1.32 | 86.3 | 113.7 |
| P48556 | 1.22 | 0.020196 | 1.17 | 107.8 | 92.2 | 1.27 | 88.2 | 111.8 |
| Q12913 | 1.67 | 0.020329 | 1.87 | 130.3 | 69.7 | 1.5  | 80   | 120   |
| Q7Z2W4 | 1.42 | 0.020526 | 1.32 | 113.7 | 86.3 | 1.53 | 79.2 | 120.8 |
| Q86YP4 | 1.21 | 0.020602 | 1.17 | 107.7 | 92.3 | 1.26 | 88.3 | 111.7 |
| O14965 | 1.23 | 0.020902 | 1.29 | 112.5 | 87.5 | 1.18 | 91.8 | 108.2 |
| O75410 | 1.2  | 0.021109 | 1.16 | 107.2 | 92.8 | 1.25 | 89   | 111   |
| Q9Y5B8 | 1.25 | 0.021128 | 1.2  | 108.9 | 91.1 | 1.32 | 86.4 | 113.6 |
| Q8WVX9 | 2.1  | 0.021612 | 1.77 | 127.8 | 72.2 | 2.49 | 57.3 | 142.7 |
| P25490 | 1.59 | 0.022323 | 1.44 | 117.9 | 82.1 | 1.77 | 72.3 | 127.7 |
| Q96T37 | 1.24 | 0.022331 | 1.18 | 108.4 | 91.6 | 1.3  | 87   | 113   |
| P16401 | 2.78 | 0.022615 | 2.14 | 136.4 | 63.6 | 3.6  | 43.5 | 156.5 |
| Q9Y2P8 | 1.33 | 0.022761 | 1.41 | 117.1 | 82.9 | 1.25 | 89   | 111   |
| Q6UXV4 | 1.2  | 0.023311 | 1.15 | 107.1 | 92.9 | 1.25 | 88.9 | 111.1 |
| O95478 | 1.45 | 0.023501 | 1.58 | 122.4 | 77.6 | 1.33 | 85.7 | 114.3 |
| P07305 | 1.53 | 0.023541 | 1.69 | 125.7 | 74.3 | 1.39 | 83.6 | 116.4 |
| Q8N5A5 | 1.7  | 0.023724 | 1.92 | 131.4 | 68.6 | 1.5  | 80   | 120   |
| P01130 | 1.35 | 0.024284 | 1.26 | 111.4 | 88.6 | 1.44 | 82   | 118   |
| Q96BH1 | 2.2  | 0.024687 | 1.81 | 128.7 | 71.3 | 2.67 | 54.5 | 145.5 |
| Q8TAD4 | 1.21 | 0.025782 | 1.27 | 111.7 | 88.3 | 1.16 | 92.7 | 107.3 |
| Q9H3R2 | 1.24 | 0.025921 | 1.3  | 113   | 87   | 1.18 | 91.9 | 108.1 |
| Q9BXF6 | 1.29 | 0.02613  | 1.37 | 115.6 | 84.4 | 1.21 | 90.3 | 109.7 |
| O00567 | 1.37 | 0.026136 | 1.27 | 112   | 88   | 1.48 | 80.7 | 119.3 |
| Q8NB16 | 1.36 | 0.026583 | 1.47 | 118.9 | 81.1 | 1.26 | 88.3 | 111.7 |

## Mechanism of shikonin in hepatocellular carcinoma

|        |      |          |      |       |      |      |      |       |
|--------|------|----------|------|-------|------|------|------|-------|
| Q9BX40 | 1.39 | 0.026622 | 1.51 | 120.2 | 79.8 | 1.29 | 87.5 | 112.5 |
| P78344 | 1.21 | 0.026858 | 1.15 | 107.1 | 92.9 | 1.26 | 88.5 | 111.5 |
| P26196 | 1.32 | 0.027421 | 1.23 | 110.5 | 89.5 | 1.41 | 82.9 | 117.1 |
| O00487 | 1.21 | 0.027521 | 1.27 | 111.9 | 88.1 | 1.16 | 92.7 | 107.3 |
| Q8N6L1 | 1.58 | 0.027613 | 1.78 | 127.9 | 72.1 | 1.41 | 82.9 | 117.1 |
| Q9BQG0 | 1.4  | 0.02815  | 1.51 | 120.5 | 79.5 | 1.29 | 87.5 | 112.5 |
| Q8N5F7 | 2.32 | 0.02821  | 2.91 | 148.9 | 51.1 | 1.85 | 70.2 | 129.8 |
| Q9NYF3 | 1.65 | 0.028581 | 1.87 | 130.3 | 69.7 | 1.45 | 81.6 | 118.4 |
| O96005 | 1.27 | 0.028684 | 1.35 | 115   | 85   | 1.2  | 90.9 | 109.1 |
| Q9NX01 | 1.51 | 0.029295 | 1.36 | 115.2 | 84.8 | 1.67 | 74.8 | 125.2 |
| P45985 | 1.24 | 0.029336 | 1.32 | 113.6 | 86.4 | 1.18 | 91.8 | 108.2 |
| Q9Y2X3 | 1.26 | 0.029857 | 1.34 | 114.5 | 85.5 | 1.19 | 91.3 | 108.7 |
| Q9H2J4 | 1.21 | 0.029857 | 1.27 | 112   | 88   | 1.16 | 92.8 | 107.2 |
| Q9GZR2 | 1.25 | 0.030374 | 1.18 | 108.3 | 91.7 | 1.32 | 86.1 | 113.9 |
| Q9BRX2 | 1.24 | 0.030393 | 1.17 | 108   | 92   | 1.31 | 86.6 | 113.4 |
| P51608 | 1.45 | 0.030487 | 1.32 | 113.6 | 86.4 | 1.59 | 77.2 | 122.8 |
| Q9UL63 | 1.3  | 0.031608 | 1.4  | 116.6 | 83.4 | 1.22 | 90.2 | 109.8 |
| Q13501 | 2.1  | 0.031755 | 2.58 | 144.1 | 55.9 | 1.7  | 74   | 126   |
| Q9NR30 | 1.32 | 0.03194  | 1.23 | 110.3 | 89.7 | 1.42 | 82.5 | 117.5 |
| O95297 | 1.21 | 0.033186 | 1.28 | 112.2 | 87.8 | 1.15 | 92.9 | 107.1 |
| P11388 | 1.7  | 0.033363 | 1.47 | 119   | 81   | 1.97 | 67.3 | 132.7 |
| Q8TD16 | 1.25 | 0.034052 | 1.18 | 108.2 | 91.8 | 1.33 | 85.8 | 114.2 |
| O15270 | 1.42 | 0.034089 | 1.57 | 122   | 78   | 1.29 | 87.3 | 112.7 |
| O75683 | 1.27 | 0.034107 | 1.35 | 114.9 | 85.1 | 1.19 | 91.4 | 108.6 |
| O95999 | 1.52 | 0.0347   | 1.71 | 126.3 | 73.7 | 1.36 | 84.9 | 115.1 |
| Q5M775 | 1.26 | 0.035822 | 1.18 | 108.3 | 91.7 | 1.34 | 85.4 | 114.6 |
| P31350 | 1.24 | 0.035851 | 1.32 | 113.9 | 86.1 | 1.17 | 92.1 | 107.9 |
| Q9Y324 | 1.22 | 0.03592  | 1.29 | 112.5 | 87.5 | 1.15 | 92.9 | 107.1 |
| Q9BXB4 | 1.24 | 0.036482 | 1.17 | 107.8 | 92.2 | 1.32 | 86.2 | 113.8 |
| P29373 | 1.23 | 0.036549 | 1.16 | 107.4 | 92.6 | 1.3  | 86.9 | 113.1 |
| Q08AD1 | 1.43 | 0.03817  | 1.29 | 112.7 | 87.3 | 1.59 | 77.2 | 122.8 |
| Q9Y287 | 1.99 | 0.0382   | 2.46 | 142.2 | 57.8 | 1.62 | 76.5 | 123.5 |
| Q6DKI1 | 1.25 | 0.038312 | 1.33 | 114.2 | 85.8 | 1.17 | 92.1 | 107.9 |
| Q9Y487 | 1.34 | 0.038974 | 1.46 | 118.8 | 81.2 | 1.23 | 89.6 | 110.4 |
| Q99543 | 1.54 | 0.038991 | 1.75 | 127.3 | 72.7 | 1.35 | 84.9 | 115.1 |
| Q8N6T3 | 1.46 | 0.039163 | 1.63 | 123.9 | 76.1 | 1.3  | 86.8 | 113.2 |
| O43752 | 1.25 | 0.039286 | 1.34 | 114.5 | 85.5 | 1.17 | 92   | 108   |
| Q8N5K1 | 1.35 | 0.040842 | 1.47 | 119.1 | 80.9 | 1.23 | 89.6 | 110.4 |
| Q9UBB5 | 1.21 | 0.040952 | 1.15 | 106.8 | 93.2 | 1.29 | 87.5 | 112.5 |
| Q9H9L3 | 1.51 | 0.041464 | 1.72 | 126.4 | 73.6 | 1.33 | 85.7 | 114.3 |
| Q15276 | 1.22 | 0.041902 | 1.15 | 106.8 | 93.2 | 1.29 | 87.4 | 112.6 |
| O75312 | 1.23 | 0.04243  | 1.31 | 113.4 | 86.6 | 1.16 | 92.8 | 107.2 |
| Q96QC0 | 1.22 | 0.043096 | 1.3  | 113.1 | 86.9 | 1.15 | 93   | 107   |
| Q8WWQ0 | 2.06 | 0.043768 | 1.62 | 123.7 | 76.3 | 2.61 | 55.4 | 144.6 |
| Q9NZW5 | 1.7  | 0.043779 | 2.01 | 133.5 | 66.5 | 1.43 | 82.2 | 117.8 |
| Q8TD30 | 1.28 | 0.044476 | 1.38 | 115.9 | 84.1 | 1.18 | 91.6 | 108.4 |
| P40818 | 1.25 | 0.044597 | 1.34 | 114.4 | 85.6 | 1.17 | 92.4 | 107.6 |
| Q9UIGO | 2.03 | 0.045774 | 2.57 | 144   | 56   | 1.6  | 77   | 123   |
| P62256 | 1.27 | 0.046658 | 1.38 | 115.8 | 84.2 | 1.18 | 91.8 | 108.2 |

## Mechanism of shikonin in hepatocellular carcinoma

|        |       |          |      |       |       |      |       |       |
|--------|-------|----------|------|-------|-------|------|-------|-------|
| Q13823 | 1.64  | 0.046658 | 1.93 | 131.6 | 68.4  | 1.39 | 83.6  | 116.4 |
| Q9UK22 | 1.26  | 0.04729  | 1.17 | 107.9 | 92.1  | 1.36 | 84.7  | 115.3 |
| Q9Y6A4 | 1.28  | 0.048217 | 1.18 | 108.2 | 91.8  | 1.38 | 84    | 116   |
| P05067 | 1.23  | 0.049478 | 1.31 | 113.6 | 86.4  | 1.15 | 93.1  | 106.9 |
| Q9Y666 | -1.2  | 0.000241 | 0.83 | 90.7  | 109.3 | 0.84 | 108.9 | 91.1  |
| Q8N1F7 | -1.2  | 0.004855 | 0.82 | 90    | 110   | 0.85 | 108.2 | 91.8  |
| Q15365 | -1.2  | 0.010051 | 0.81 | 89.6  | 110.4 | 0.86 | 107.8 | 92.2  |
| P31040 | -1.2  | 0.023311 | 0.8  | 88.9  | 111.1 | 0.87 | 107.1 | 92.9  |
| Q8TE02 | -1.2  | 0.000236 | 0.83 | 90.6  | 109.4 | 0.84 | 109   | 91    |
| Q96IZ7 | -1.2  | 0.043326 | 0.88 | 93.6  | 106.4 | 0.79 | 112   | 88    |
| O75436 | -1.2  | 0.046261 | 0.88 | 93.7  | 106.3 | 0.78 | 112.1 | 87.9  |
| Q12962 | -1.21 | 0.001442 | 0.84 | 91.2  | 108.8 | 0.82 | 109.8 | 90.2  |
| Q9GZY8 | -1.21 | 0.023202 | 0.8  | 88.6  | 111.4 | 0.86 | 107.3 | 92.7  |
| O95239 | -1.21 | 0.037896 | 0.79 | 88    | 112   | 0.87 | 106.7 | 93.3  |
| Q03135 | -1.21 | 0.00805  | 0.81 | 89.4  | 110.6 | 0.85 | 108.2 | 91.8  |
| O14964 | -1.21 | 0.031082 | 0.79 | 88.2  | 111.8 | 0.87 | 107   | 93    |
| Q06124 | -1.21 | 0.010051 | 0.81 | 89.2  | 110.8 | 0.85 | 108.1 | 91.9  |
| Q99567 | -1.21 | 0.027194 | 0.79 | 88.3  | 111.7 | 0.87 | 107.2 | 92.8  |
| P49959 | -1.21 | 0.000498 | 0.82 | 90.2  | 109.8 | 0.83 | 109.2 | 90.8  |
| P30837 | -1.21 | 0.001654 | 0.84 | 91    | 109   | 0.82 | 110.1 | 89.9  |
| O43663 | -1.21 | 0.044546 | 0.88 | 93.4  | 106.6 | 0.78 | 112.5 | 87.5  |
| O75208 | -1.21 | 0.000217 | 0.82 | 90.2  | 109.8 | 0.83 | 109.4 | 90.6  |
| P28065 | -1.21 | 0.006501 | 0.81 | 89.3  | 110.7 | 0.84 | 108.5 | 91.5  |
| Q6PL18 | -1.21 | 0.02102  | 0.79 | 88.4  | 111.6 | 0.86 | 107.6 | 92.4  |
| Q9NRS6 | -1.21 | 0.025268 | 0.86 | 92.6  | 107.4 | 0.79 | 111.8 | 88.2  |
| Q5VW32 | -1.21 | 0.00162  | 0.82 | 89.8  | 110.2 | 0.83 | 109.1 | 90.9  |
| Q96NB3 | -1.21 | 0.038288 | 0.78 | 87.6  | 112.4 | 0.87 | 106.9 | 93.1  |
| P51692 | -1.21 | 0.007566 | 0.84 | 91.5  | 108.5 | 0.8  | 110.9 | 89.1  |
| Q00796 | -1.21 | 0.024768 | 0.79 | 88.1  | 111.9 | 0.86 | 107.5 | 92.5  |
| O95630 | -1.22 | 1.31E-05 | 0.82 | 90.2  | 109.8 | 0.82 | 109.7 | 90.3  |
| P34896 | -1.22 | 0.017529 | 0.85 | 92.1  | 107.9 | 0.79 | 111.6 | 88.4  |
| Q9H267 | -1.22 | 0.03592  | 0.78 | 87.5  | 112.5 | 0.87 | 107.1 | 92.9  |
| P36776 | -1.22 | 0.029568 | 0.86 | 92.6  | 107.4 | 0.78 | 112.3 | 87.7  |
| O00148 | -1.22 | 0.005063 | 0.84 | 91.1  | 108.9 | 0.8  | 110.9 | 89.1  |
| Q9UK41 | -1.22 | 0.014425 | 0.79 | 88.4  | 111.6 | 0.85 | 108.2 | 91.8  |
| Q96RN5 | -1.22 | 0.015117 | 0.85 | 91.8  | 108.2 | 0.79 | 111.7 | 88.3  |
| Q15006 | -1.22 | 0.000799 | 0.81 | 89.6  | 110.4 | 0.82 | 109.6 | 90.4  |
| Q7Z434 | -1.22 | 0.003185 | 0.81 | 89.2  | 110.8 | 0.83 | 109.2 | 90.8  |
| P42166 | -1.22 | 0.032177 | 0.78 | 87.4  | 112.6 | 0.86 | 107.4 | 92.6  |
| P54725 | -1.22 | 0.002393 | 0.81 | 89.2  | 110.8 | 0.83 | 109.4 | 90.6  |
| Q8IVM0 | -1.22 | 0.008182 | 0.84 | 91.2  | 108.8 | 0.8  | 111.4 | 88.6  |
| O15533 | -1.23 | 0.004352 | 0.83 | 90.8  | 109.2 | 0.8  | 111.1 | 88.9  |
| Q7Z2Z2 | -1.23 | 0.027918 | 0.78 | 87.4  | 112.6 | 0.86 | 107.7 | 92.3  |
| P21912 | -1.23 | 0.000297 | 0.82 | 90    | 110   | 0.81 | 110.5 | 89.5  |
| O43708 | -1.23 | 0.001437 | 0.82 | 90.3  | 109.7 | 0.81 | 110.8 | 89.2  |
| Q8IX01 | -1.23 | 0.032683 | 0.86 | 92.4  | 107.6 | 0.77 | 113   | 87    |
| PODMN0 | -1.23 | 0.009671 | 0.79 | 88.2  | 111.8 | 0.84 | 108.9 | 91.1  |
| Q9BSJ2 | -1.23 | 0.01247  | 0.84 | 91.3  | 108.7 | 0.79 | 112   | 88    |
| P28340 | -1.23 | 0.019056 | 0.78 | 87.6  | 112.4 | 0.85 | 108.3 | 91.7  |

## Mechanism of shikonin in hepatocellular carcinoma

|        |       |          |      |      |       |      |       |      |
|--------|-------|----------|------|------|-------|------|-------|------|
| Q9UBB9 | -1.23 | 0.00166  | 0.8  | 89   | 111   | 0.82 | 109.8 | 90.2 |
| P29353 | -1.23 | 0.007722 | 0.79 | 88.3 | 111.7 | 0.83 | 109.1 | 90.9 |
| O00264 | -1.23 | 0.000103 | 0.81 | 89.7 | 110.3 | 0.81 | 110.6 | 89.4 |
| P56378 | -1.23 | 0.001132 | 0.8  | 89   | 111   | 0.82 | 110   | 90   |
| O43824 | -1.23 | 0.001629 | 0.8  | 88.9 | 111.1 | 0.82 | 109.9 | 90.1 |
| Q9HB07 | -1.24 | 0.034605 | 0.76 | 86.6 | 113.4 | 0.86 | 107.7 | 92.3 |
| P26885 | -1.24 | 0.007437 | 0.79 | 88.1 | 111.9 | 0.83 | 109.3 | 90.7 |
| P20020 | -1.24 | 0.008609 | 0.79 | 88   | 112   | 0.83 | 109.2 | 90.8 |
| P36404 | -1.24 | 0.038647 | 0.86 | 92.4 | 107.6 | 0.76 | 113.7 | 86.3 |
| Q9NWZ3 | -1.24 | 0.019419 | 0.84 | 91.4 | 108.6 | 0.77 | 112.9 | 87.1 |
| Q16698 | -1.24 | 0.025001 | 0.77 | 86.8 | 113.2 | 0.85 | 108.3 | 91.7 |
| O43819 | -1.24 | 0.045283 | 0.75 | 85.9 | 114.1 | 0.86 | 107.4 | 92.6 |
| Q9C0B1 | -1.24 | 0.025761 | 0.85 | 91.7 | 108.3 | 0.76 | 113.3 | 86.7 |
| P07203 | -1.25 | 0.030903 | 0.76 | 86.2 | 113.8 | 0.85 | 108.2 | 91.8 |
| Q15631 | -1.25 | 1.02E-05 | 0.8  | 88.9 | 111.1 | 0.8  | 111   | 89   |
| Q9Y2Q3 | -1.25 | 0.047927 | 0.86 | 92.5 | 107.5 | 0.75 | 114.6 | 85.4 |
| P18846 | -1.25 | 0.001013 | 0.81 | 89.4 | 110.6 | 0.79 | 111.6 | 88.4 |
| Q9NVE7 | -1.25 | 0.046288 | 0.75 | 85.4 | 114.6 | 0.86 | 107.6 | 92.4 |
| Q96ES7 | -1.25 | 0.031149 | 0.75 | 86   | 114   | 0.85 | 108.3 | 91.7 |
| Q9Y296 | -1.25 | 0.003962 | 0.78 | 87.8 | 112.2 | 0.82 | 110.2 | 89.8 |
| Q9UPQ0 | -1.25 | 0.00885  | 0.77 | 87.3 | 112.7 | 0.82 | 109.7 | 90.3 |
| Q9C0B5 | -1.25 | 0.000247 | 0.79 | 88.5 | 111.5 | 0.8  | 111   | 89   |
| O15357 | -1.26 | 0.000242 | 0.8  | 88.9 | 111.1 | 0.79 | 111.6 | 88.4 |
| O14980 | -1.26 | 0.015923 | 0.83 | 90.7 | 109.3 | 0.76 | 113.4 | 86.6 |
| Q5R3I4 | -1.26 | 0.040904 | 0.74 | 85.3 | 114.7 | 0.85 | 108   | 92   |
| Q0ZGT2 | -1.26 | 0.045595 | 0.74 | 85.1 | 114.9 | 0.85 | 107.8 | 92.2 |
| Q8N3D4 | -1.26 | 0.032925 | 0.75 | 85.6 | 114.4 | 0.85 | 108.4 | 91.6 |
| Q93096 | -1.26 | 0.04404  | 0.74 | 85.1 | 114.9 | 0.85 | 107.9 | 92.1 |
| O94763 | -1.26 | 0.027651 | 0.75 | 85.8 | 114.2 | 0.84 | 108.7 | 91.3 |
| P16949 | -1.26 | 0.004544 | 0.81 | 89.6 | 110.4 | 0.78 | 112.6 | 87.4 |
| Q969Z0 | -1.26 | 0.048058 | 0.86 | 92.2 | 107.8 | 0.74 | 115.2 | 84.8 |
| Q9NSE4 | -1.26 | 0.000234 | 0.8  | 88.7 | 111.3 | 0.79 | 111.8 | 88.2 |
| Q9NUM3 | -1.26 | 0.008885 | 0.77 | 86.9 | 113.1 | 0.82 | 110   | 90   |
| P41240 | -1.26 | 0.006221 | 0.81 | 89.7 | 110.3 | 0.77 | 112.9 | 87.1 |
| P21333 | -1.26 | 0.002066 | 0.8  | 89.1 | 110.9 | 0.78 | 112.4 | 87.6 |
| P41214 | -1.26 | 0.018144 | 0.76 | 86.1 | 113.9 | 0.83 | 109.4 | 90.6 |
| Q96ER9 | -1.27 | 0.048139 | 0.85 | 92   | 108   | 0.73 | 115.6 | 84.4 |
| Q8IZ73 | -1.27 | 0.003198 | 0.77 | 87.2 | 112.8 | 0.8  | 110.9 | 89.1 |
| Q6P3X3 | -1.27 | 0.027725 | 0.74 | 85.3 | 114.7 | 0.84 | 109   | 91   |
| Q96CU9 | -1.28 | 0.024003 | 0.83 | 90.6 | 109.4 | 0.74 | 114.8 | 85.2 |
| P04150 | -1.28 | 0.001428 | 0.79 | 88.5 | 111.5 | 0.77 | 112.8 | 87.2 |
| P33527 | -1.28 | 0.000408 | 0.79 | 88.1 | 111.9 | 0.78 | 112.6 | 87.4 |
| Q8WUB8 | -1.28 | 0.013715 | 0.81 | 89.8 | 110.2 | 0.75 | 114.3 | 85.7 |
| P68402 | -1.28 | 0.013715 | 0.82 | 89.8 | 110.2 | 0.75 | 114.3 | 85.7 |
| Q8IY17 | -1.28 | 0.007784 | 0.76 | 86.1 | 113.9 | 0.81 | 110.8 | 89.2 |
| Q96H79 | -1.28 | 0.013498 | 0.75 | 85.6 | 114.4 | 0.81 | 110.3 | 89.7 |
| O75369 | -1.28 | 0.005451 | 0.8  | 88.9 | 111.1 | 0.76 | 113.7 | 86.3 |
| Q8IZ69 | -1.28 | 0.015941 | 0.74 | 85.3 | 114.7 | 0.82 | 110.2 | 89.8 |
| Q16822 | -1.29 | 0.003185 | 0.76 | 86.5 | 113.5 | 0.79 | 111.5 | 88.5 |



## Mechanism of shikonin in hepatocellular carcinoma

|        |       |          |      |      |       |      |       |      |
|--------|-------|----------|------|------|-------|------|-------|------|
| Q7Z7H5 | -1.29 | 0.023176 | 0.74 | 84.7 | 115.3 | 0.82 | 109.8 | 90.2 |
| Q01082 | -1.29 | 0.000195 | 0.78 | 87.6 | 112.4 | 0.77 | 112.9 | 87.1 |
| Q15043 | -1.29 | 0.000632 | 0.77 | 86.9 | 113.1 | 0.78 | 112.2 | 87.8 |
| Q9H9B1 | -1.29 | 0.019719 | 0.82 | 89.9 | 110.1 | 0.74 | 115.2 | 84.8 |
| Q96CP2 | -1.29 | 0.001516 | 0.79 | 88   | 112   | 0.76 | 113.4 | 86.6 |
| Q9Y490 | -1.29 | 0.002502 | 0.76 | 86.4 | 113.6 | 0.79 | 111.8 | 88.2 |
| O60831 | -1.29 | 0.036645 | 0.72 | 83.7 | 116.3 | 0.83 | 109.2 | 90.8 |
| Q9P086 | -1.29 | 0.028097 | 0.73 | 84.1 | 115.9 | 0.82 | 109.7 | 90.3 |
| O00291 | -1.3  | 0.048396 | 0.71 | 83   | 117   | 0.84 | 108.7 | 91.3 |
| Q13085 | -1.3  | 0.00027  | 0.77 | 86.8 | 113.2 | 0.78 | 112.6 | 87.4 |
| O75376 | -1.3  | 0.023638 | 0.72 | 84   | 116   | 0.81 | 110.2 | 89.8 |
| P23743 | -1.3  | 0.000874 | 0.76 | 86.3 | 113.7 | 0.78 | 112.6 | 87.4 |
| P49757 | -1.3  | 0.005577 | 0.75 | 85.4 | 114.6 | 0.79 | 111.8 | 88.2 |
| O43493 | -1.31 | 0.000178 | 0.77 | 87   | 113   | 0.76 | 113.5 | 86.5 |
| O95613 | -1.31 | 0.007159 | 0.79 | 88.3 | 111.7 | 0.74 | 114.9 | 85.1 |
| A9UHW6 | -1.31 | 0.024508 | 0.81 | 89.7 | 110.3 | 0.72 | 116.3 | 83.7 |
| Q9Y657 | -1.31 | 0.044376 | 0.7  | 82.6 | 117.4 | 0.83 | 109.2 | 90.8 |
| Q07960 | -1.31 | 0.001751 | 0.77 | 87.3 | 112.7 | 0.75 | 114.3 | 85.7 |
| Q8IXM2 | -1.31 | 0.041202 | 0.7  | 82.5 | 117.5 | 0.83 | 109.5 | 90.5 |
| Q00653 | -1.31 | 0.00017  | 0.76 | 86.2 | 113.8 | 0.77 | 113.3 | 86.7 |
| Q9HA77 | -1.31 | 0.013508 | 0.73 | 84.2 | 115.8 | 0.8  | 111.3 | 88.7 |
| Q9P2T1 | -1.31 | 0.002692 | 0.78 | 87.4 | 112.6 | 0.75 | 114.6 | 85.4 |
| Q9H845 | -1.32 | 0.029857 | 0.81 | 89.8 | 110.2 | 0.71 | 117   | 83   |
| O00458 | -1.32 | 0.017006 | 0.72 | 83.8 | 116.2 | 0.8  | 111.1 | 88.9 |
| O15235 | -1.32 | 0.00893  | 0.73 | 84.4 | 115.6 | 0.79 | 111.9 | 88.1 |
| Q9NRM1 | -1.32 | 5.86E-05 | 0.76 | 86.3 | 113.7 | 0.75 | 114   | 86   |
| P49588 | -1.32 | 0.018348 | 0.72 | 83.4 | 116.6 | 0.8  | 111.2 | 88.8 |
| Q02388 | -1.32 | 0.032567 | 0.81 | 89.7 | 110.3 | 0.7  | 117.6 | 82.4 |
| Q9BYT8 | -1.33 | 0.006467 | 0.73 | 84.4 | 115.6 | 0.78 | 112.4 | 87.6 |
| Q69YN2 | -1.33 | 0.013228 | 0.72 | 83.7 | 116.3 | 0.79 | 111.7 | 88.3 |
| Q9Y4U1 | -1.33 | 0.030059 | 0.81 | 89.4 | 110.6 | 0.7  | 117.7 | 82.3 |
| Q9H3H3 | -1.33 | 0.033991 | 0.81 | 89.6 | 110.4 | 0.7  | 118   | 82   |
| O43294 | -1.33 | 0.000301 | 0.76 | 86.1 | 113.9 | 0.75 | 114.6 | 85.4 |
| Q9Y315 | -1.33 | 0.006992 | 0.72 | 84   | 116   | 0.78 | 112.6 | 87.4 |
| O60671 | -1.33 | 0.009639 | 0.72 | 83.7 | 116.3 | 0.78 | 112.3 | 87.7 |
| Q99541 | -1.33 | 0.030258 | 0.81 | 89.3 | 110.7 | 0.7  | 117.9 | 82.1 |
| Q96DC8 | -1.34 | 0.005382 | 0.77 | 87.1 | 112.9 | 0.73 | 115.9 | 84.1 |
| Q9HAV4 | -1.34 | 0.02102  | 0.7  | 82.6 | 117.4 | 0.8  | 111.4 | 88.6 |
| O95208 | -1.34 | 0.002594 | 0.73 | 84.4 | 115.6 | 0.76 | 113.5 | 86.5 |
| Q02252 | -1.34 | 0.00367  | 0.77 | 86.7 | 113.3 | 0.73 | 115.8 | 84.2 |
| O95571 | -1.34 | 0.037859 | 0.81 | 89.5 | 110.5 | 0.68 | 118.8 | 81.2 |
| Q8N201 | -1.35 | 0.004733 | 0.76 | 86.6 | 113.4 | 0.72 | 116.3 | 83.7 |
| Q96RQ3 | -1.35 | 9.01E-05 | 0.74 | 85.3 | 114.7 | 0.74 | 115.1 | 84.9 |
| P25325 | -1.35 | 0.000447 | 0.75 | 85.4 | 114.6 | 0.73 | 115.5 | 84.5 |
| Q15021 | -1.36 | 0.031773 | 0.8  | 88.8 | 111.2 | 0.68 | 119   | 81   |
| Q9UPN3 | -1.36 | 0.026041 | 0.79 | 88.3 | 111.7 | 0.68 | 118.8 | 81.2 |
| O60437 | -1.36 | 0.007623 | 0.71 | 82.8 | 117.2 | 0.76 | 113.4 | 86.6 |
| P19838 | -1.36 | 0.034658 | 0.8  | 88.8 | 111.2 | 0.67 | 119.5 | 80.5 |
| Q9NVA1 | -1.36 | 0.006762 | 0.71 | 82.8 | 117.2 | 0.76 | 113.6 | 86.4 |



## Mechanism of shikonin in hepatocellular carcinoma

|        |       |          |      |      |       |      |       |      |
|--------|-------|----------|------|------|-------|------|-------|------|
| P41252 | -1.37 | 0.00465  | 0.76 | 86   | 114   | 0.71 | 117   | 83   |
| Q9H3S7 | -1.37 | 0.002272 | 0.75 | 85.5 | 114.5 | 0.72 | 116.6 | 83.4 |
| Q15149 | -1.37 | 0.009798 | 0.76 | 86.6 | 113.4 | 0.7  | 117.8 | 82.2 |
| O75381 | -1.37 | 0.004211 | 0.71 | 82.8 | 117.2 | 0.75 | 114.3 | 85.7 |
| Q09666 | -1.38 | 0.000244 | 0.72 | 83.8 | 116.2 | 0.73 | 115.5 | 84.5 |
| Q8TD19 | -1.38 | 0.029323 | 0.67 | 80.1 | 119.9 | 0.79 | 112   | 88   |
| O00170 | -1.39 | 0.002081 | 0.74 | 84.8 | 115.2 | 0.71 | 117.3 | 82.7 |
| Q5BKU9 | -1.4  | 0.044656 | 0.64 | 78.2 | 121.8 | 0.79 | 111.5 | 88.5 |
| Q8TEM1 | -1.4  | 0.001449 | 0.73 | 84.2 | 115.8 | 0.7  | 117.6 | 82.4 |
| Q96HY7 | -1.41 | 0.009134 | 0.74 | 85.4 | 114.6 | 0.68 | 119.2 | 80.8 |
| Q12768 | -1.41 | 0.015393 | 0.67 | 80.1 | 119.9 | 0.76 | 113.9 | 86.1 |
| Q8TB61 | -1.41 | 0.013142 | 0.67 | 80.1 | 119.9 | 0.75 | 114.3 | 85.7 |
| Q9BW92 | -1.42 | 6.68E-05 | 0.71 | 82.9 | 117.1 | 0.7  | 117.5 | 82.5 |
| Q86UV5 | -1.42 | 0.009824 | 0.74 | 85.1 | 114.9 | 0.67 | 119.8 | 80.2 |
| Q9UK61 | -1.42 | 0.025892 | 0.65 | 78.5 | 121.5 | 0.76 | 113.4 | 86.6 |
| Q9UBY9 | -1.43 | 0.006116 | 0.73 | 84.4 | 115.6 | 0.67 | 119.5 | 80.5 |
| P42229 | -1.43 | 0.000891 | 0.71 | 83   | 117   | 0.69 | 118.5 | 81.5 |
| Q9H467 | -1.43 | 0.003791 | 0.68 | 80.7 | 119.3 | 0.72 | 116.2 | 83.8 |
| Q5PRF9 | -1.44 | 6.24E-05 | 0.69 | 81.9 | 118.1 | 0.7  | 117.7 | 82.3 |
| Q8IV48 | -1.44 | 0.00025  | 0.7  | 82.5 | 117.5 | 0.69 | 118.3 | 81.7 |
| O75909 | -1.44 | 0.033765 | 0.63 | 77.2 | 122.8 | 0.77 | 113.2 | 86.8 |
| Q6PI98 | -1.45 | 0.038476 | 0.62 | 76.6 | 123.4 | 0.77 | 113   | 87   |
| Q68CP9 | -1.45 | 0.005856 | 0.72 | 83.6 | 116.4 | 0.66 | 120.4 | 79.6 |
| P98082 | -1.45 | 0.015705 | 0.64 | 78.3 | 121.7 | 0.74 | 115.1 | 84.9 |
| O43674 | -1.47 | 0.006116 | 0.71 | 83.2 | 116.8 | 0.65 | 121   | 79   |
| Q9BSY4 | -1.47 | 0.042174 | 0.77 | 86.7 | 113.3 | 0.6  | 124.7 | 75.3 |
| O60503 | -1.49 | 0.045174 | 0.76 | 86.5 | 113.5 | 0.59 | 125.7 | 74.3 |
| Q92797 | -1.49 | 0.001042 | 0.68 | 81.2 | 118.8 | 0.66 | 120.6 | 79.4 |
| Q15059 | -1.49 | 0.03729  | 0.6  | 74.7 | 125.3 | 0.75 | 114.2 | 85.8 |
| Q8WX92 | -1.5  | 0.023356 | 0.73 | 84.4 | 115.6 | 0.61 | 124.4 | 75.6 |
| Q9BQP7 | -1.5  | 0.001625 | 0.68 | 81   | 119   | 0.65 | 121.3 | 78.7 |
| Q9BQS8 | -1.51 | 4.90E-05 | 0.67 | 80   | 120   | 0.66 | 120.4 | 79.6 |
| Q03001 | -1.53 | 0.01182  | 0.7  | 82.3 | 117.7 | 0.61 | 124.2 | 75.8 |
| Q7Z6Z7 | -1.53 | 0.012428 | 0.7  | 82.3 | 117.7 | 0.61 | 124.4 | 75.6 |
| Q6P9B6 | -1.55 | 0.000784 | 0.64 | 77.7 | 122.3 | 0.66 | 120.6 | 79.4 |
| O95747 | -1.56 | 0.018561 | 0.59 | 74   | 126   | 0.7  | 117.5 | 82.5 |
| Q6UWP7 | -1.56 | 0.007583 | 0.68 | 80.9 | 119.1 | 0.61 | 124.5 | 75.5 |
| Q96BJ3 | -1.56 | 0.021546 | 0.71 | 82.8 | 117.2 | 0.58 | 126.4 | 73.6 |
| Q99798 | -1.56 | 0.003361 | 0.62 | 76.3 | 123.7 | 0.67 | 120.1 | 79.9 |
| Q9NQH7 | -1.58 | 0.009963 | 0.68 | 80.7 | 119.3 | 0.59 | 125.7 | 74.3 |
| Q96BW5 | -1.6  | 0.007788 | 0.59 | 74   | 126   | 0.66 | 120.2 | 79.8 |
| Q6WCQ1 | -1.61 | 0.001553 | 0.64 | 78   | 122   | 0.61 | 124.6 | 75.4 |
| Q68CZ2 | -1.63 | 0.010301 | 0.57 | 72.7 | 127.3 | 0.66 | 120.4 | 79.6 |
| Q53EL6 | -1.63 | 0.003119 | 0.59 | 74.1 | 125.9 | 0.64 | 122.1 | 77.9 |
| Q15172 | -1.64 | 0.007046 | 0.57 | 72.8 | 127.2 | 0.65 | 121.4 | 78.6 |
| O15438 | -1.65 | 0.009569 | 0.57 | 72.2 | 127.8 | 0.65 | 121   | 79   |
| Q9NVM9 | -1.66 | 0.027152 | 0.68 | 81.1 | 118.9 | 0.53 | 130.7 | 69.3 |
| O95155 | -1.66 | 0.027489 | 0.68 | 81.1 | 118.9 | 0.53 | 130.8 | 69.2 |
| Q9Y530 | -1.7  | 7.40E-06 | 0.59 | 74.1 | 125.9 | 0.59 | 126.1 | 73.9 |

## Mechanism of shikonin in hepatocellular carcinoma

|        |       |          |      |      |       |      |       |      |
|--------|-------|----------|------|------|-------|------|-------|------|
| Q9BQ24 | -1.72 | 0.000351 | 0.57 | 72.9 | 127.1 | 0.59 | 125.7 | 74.3 |
| O95260 | -1.73 | 0.002504 | 0.55 | 71.3 | 128.7 | 0.6  | 124.9 | 75.1 |
| O95466 | -1.74 | 0.003582 | 0.6  | 75.2 | 124.8 | 0.55 | 129.4 | 70.6 |
| P50748 | -1.77 | 0.04497  | 0.47 | 63.7 | 136.3 | 0.68 | 119.1 | 80.9 |
| P55061 | -1.8  | 6.16E-06 | 0.56 | 71.6 | 128.4 | 0.56 | 128.6 | 71.4 |
| Q01664 | -1.86 | 0.032091 | 0.45 | 62.4 | 137.6 | 0.64 | 122.1 | 77.9 |
| Q92625 | -2.05 | 0.018766 | 0.42 | 58.9 | 141.1 | 0.57 | 127.6 | 72.4 |
| Q96I59 | -2.06 | 0.006293 | 0.44 | 61.5 | 138.5 | 0.53 | 130.7 | 69.3 |
| Q9NVD7 | -2.2  | 0.020758 | 0.38 | 55.1 | 144.9 | 0.55 | 129.5 | 70.5 |
| Q2NKX8 | -2.33 | 0.015017 | 0.37 | 53.4 | 146.6 | 0.51 | 132.7 | 67.3 |
| Q9NXF7 | -2.67 | 0.003772 | 0.34 | 50.7 | 149.3 | 0.42 | 141.4 | 58.6 |
| Q92896 | -3.01 | 0.038106 | 0.23 | 37.2 | 162.8 | 0.48 | 135   | 65   |
| O15020 | -3.09 | 0.049976 | 0.21 | 34.5 | 165.5 | 0.5  | 133.1 | 66.9 |
| Q9Y2F5 | -8    | 0.035959 | 0.05 | 9.3  | 190.7 | 0.32 | 151.5 | 48.5 |

<sup>a</sup>FC: Fold change; <sup>b</sup>F-FC: Forward labeling: (Light, shikonin)/(Heavy, Control); <sup>c</sup>F-L: Forward labeling: Light, Shikonin; <sup>d</sup>F-H: Forward labeling: Heavy, Control; <sup>e</sup>R-FC: Reverse labeling: (Heavy, shikonin)/(Light, Control); <sup>f</sup>R-L: Reverse labeling: Light, Control; <sup>g</sup>R-H: Reverse labeling: Heavy, Shikonin.
